# Supplementary material for: Indoor Positioning Using Frequency Translators
Source: Royal Society of Chemistry journal article supplement (doi:10.1039/d2dt02927h), 2005-09-16
Supplement: d2dt02927h1.pdf [file d2dt02927h1.pdf]

# Supplementary Information

## 1. Synthesis

According to previous reports, carbon spheres (CS) were synthesized by hydrothermal method using glucose as raw material. The 0.5 mol glucose was dissolved in 40 mL deionized water, stirred for 15 min and placed in a 50 mL autoclave (lined with polytetrafluoroethylene). Subsequently, it was naturally cooled to room temperature after 7 h at 170-180 °C. After ultrasonic washing and centrifugation, the samples were dried at 80 °C for 8 h in a vacuum dryer to obtain CS material.

TDA@LDH/CS materials were prepared by co-precipitation method under supersaturated conditions.  $\text{MgCl}_2 \cdot 6\text{H}_2\text{O}$  and  $\text{AlCl}_3 \cdot 6\text{H}_2\text{O}$  were dissolved in 40 mL deionized water with  $\text{Mg}^{2+} / \text{Al}^{3+}$  molar ratio of 5 : 1. Then 0.3 g CS and 3 mL TDA were added into the salt solution, ultrasonic stirring 30min as the precursor solution. Then, the precursor salt solution was added dropwise to 100 mL NaOH solution ( $2 \text{ mol} \cdot \text{L}^{-1}$ ), and the final pH value was controlled at  $13 \pm 0.1$ . It was then stirred at room temperature for 4 hours, and then placed in a 60 °C water bath for 12 hours of aging. The aged liquid was then washed by centrifugation at  $8000 \text{ r} \cdot \text{min}^{-1}$  until the supernatant was neutral. Finally, the precipitated solid was dried at 80 °C to prepare TDA@LDH/CS. Similarly, LDH/CS materials and LDH materials were prepared under the same conditions.

## 2. Characterization

The phase constituents and crystal structure were determined using XRD (Rigaku Ultima IV, Japan) with Cu K $\alpha$  radiation at  $2\theta$  from 5° to 90°. The surface functional groups of the composites were tested by FTIR (Bruker Alpha, Germany), and the spectra of 400-4000  $\text{cm}^{-1}$  were recorded. The surface morphology and elemental composition of the samples was performed using SEM (ZEISS Sigma 300, Germany) and EDS (Oxford · Britain). The porosity and surface area were calculated using a BET

analyzer under atmospheric nitrogen conditions (ASAP 2460,USA), while the pore size distribution (PSD) was estimated by the Barrett–Joyner–Halenda (BJH) theory. The surface elements of the composites before and after modification were measured by an XPS measurement (Thermo Scientific K-Alpha, USA). TG curves for the sorbents were determined by using a Mettler TGA/DSC thermogravimetric analyzer (TG 209 F3 Nevio, Germany) at a heating rate of 10 °C/min from 30 °C to 700 °C under N<sub>2</sub> flow. Indirect determination of zero point charge (pH<sub>pzc</sub>) of composites by “drift method”.

### 3. Calculation Method

(1) The adsorption capacities at interval time  $Q_t$  (mg·g<sup>-1</sup>) and equilibrium time  $Q_e$  (mg·g<sup>-1</sup>), respectively, are calculated as below:

$$Q_t = \frac{(C_0 - C_t) V}{m} \quad (\text{S-1})$$

$$Q_e = \frac{(C_0 - C_e) V}{m} \quad (\text{S-2})$$

Where  $C_0$  (mg·L<sup>-1</sup>),  $C_t$  (mg·L<sup>-1</sup>), and  $C_e$  (mg·L<sup>-1</sup>) are the concentrations of nitrite at the initial time, interval time, and equilibrium time, respectively;  $m$  (g) is the weight of the as-synthesized samples;  $V$  (L) is the volume of the aqueous solution.

The calculation expressions related to removal rate ( $RE$ ) is as follows:

$$RE = \frac{C_0 - C_t}{C_0} \quad (\text{S-3})$$

(2) The models used for adsorption kinetics is as follows:

Pseudo-first-order model:

$$Q_t = Q_e (1 - e^{-k_1 t}) \quad (\text{S-4})$$

Pseudo-second-order model:

$$Q_t = \frac{k_2 Q_e^2 t}{1 + k_2 Q_e t} \quad (\text{S-5})$$

Intraparticle diffusion model:

$$Q_t = k_i t^{\frac{1}{2}} + C \quad (\text{S-6})$$

Where  $k_1$  ( $\text{min}^{-1}$ ),  $k_2$  ( $\text{g} \cdot \text{mg}^{-1} \cdot \text{min}^{-1}$ ),  $k_i$  ( $\text{mg} \cdot \text{g}^{-1} \cdot \text{min}^{-1/2}$ ) are the rate constant for the corresponding model in the Exp (4-6),  $C$  ( $\text{mg} \cdot \text{g}^{-1}$ ) is the intercept.

(3) The adsorption thermodynamics and adsorption isotherm models are as follows:

Langmuir model:

$$Q_e = \frac{Q_m K_L C_e}{1 + K_L C_e} \quad (\text{S-7})$$

Freundlich model:

$$Q_e = K_F C_e^n \quad (\text{S-8})$$

Temkin model:

$$Q_e = b_T \ln(K_T C_e) \quad (\text{S-9})$$

Redlich-Peterson (R-P) model:

$$Q_e = \frac{K_R C_e}{1 + K_p C_e^g} \quad (\text{S-10})$$

10)

Where  $C_e$  ( $\text{mg} \cdot \text{L}^{-1}$ ) is the equilibrium concentration;  $Q_m$  ( $\text{mg} \cdot \text{g}^{-1}$ ) is the maximum adsorption capacity,  $K_L$  ( $\text{L} \cdot \text{mg}^{-1}$ ) is the adsorption equilibrium constant of Langmuir adsorption isotherm mode;  $K_F$  ( $\text{mg} \cdot \text{g}^{-1}$ ) is the empirical constant of Freundlich model ( $\text{mg} \cdot \text{g}^{-1}$ );  $K_T$  ( $\text{L} \cdot \text{mg}^{-1}$ ) is the equilibrium binding constant ( $\text{L} \cdot \text{mg}^{-1}$ ),  $b_T$  ( $\text{J} \cdot \text{mol}^{-1}$ ) is the Temkin constant.

Van't Hoff equation:

$$\Delta G^0 = -RT \ln K_c \quad (\text{S-11})$$

$$K_c = 55.5 \times 1000 \times K_L M_A \quad (\text{S-12})$$

$$\ln K_c = -\frac{\Delta H^0}{RT} + \frac{\Delta S^0}{R} \quad (\text{S-13})$$

where  $R$  is the ideal gas constant (8.314 J/mol·K),  $K_C$  is denoted thermodynamic equilibrium constant (dimensionless). The factor 55.5 is the number of moles of pure water per liter (1000 g/L divided by 18g/mol), and  $K_L$  (L/mg) is the Langmuir adsorption equilibrium constant,  $M_A$  is the molecular weight of the adsorbate ( $\text{NO}_3^-$ -N) (g/mol).

#### 4. Characterization and experimental results

(1) The EDS spectra of the composites before and after adsorption are shown in **Fig. S1**.

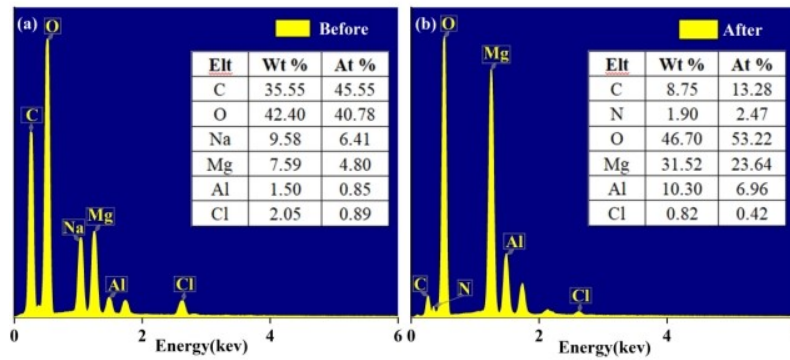

**Fig. S1.** EDS patterns of TDA@LDH/CS (a) before and (b) after adsorption.

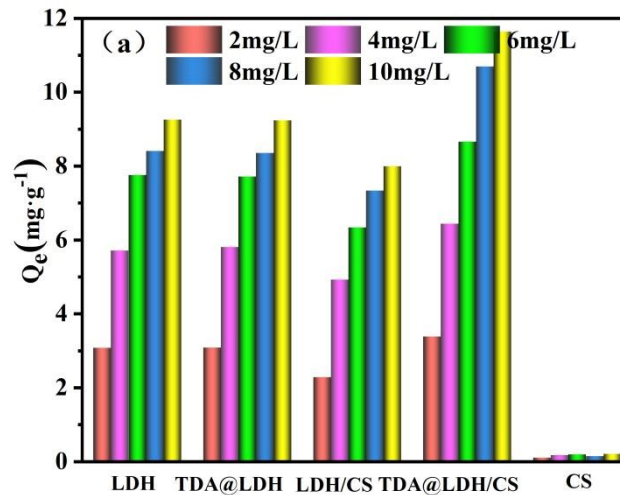

**Fig.S2** Comparison of the adsorption capacities of LDH, LDH/CS, CS and TDA@LDH/CS on  $\text{NO}_3^-$  at various concentrations,  $T=298\text{ K}$ , dosage(m/V) =0.5 g/L.

(2) **Table S1.** The BET specific surface area and pore size distribution of LDH, LDH/CS and TDA@LDH/CS

|            | $S_{\text{BET}}$ ( $\text{m}^2 \cdot \text{g}^{-1}$ ) | $V_p$ ( $\text{cm}^3 \cdot \text{g}^{-1}$ ) | $D_{\text{BJH}}$ (nm) |
|------------|-------------------------------------------------------|---------------------------------------------|-----------------------|
| LDH        | 32.25                                                 | 0.24                                        | 17.52                 |
| LDH/CS     | 46.41                                                 | 0.12                                        | 5.72                  |
| TDA@LDH/CS | 67.15                                                 | 0.26                                        | 10.57                 |

$S_{\text{BET}}$ : area by BET method;  $V_p$ : total pore volume;  $D_{\text{BJH}}$ : pore diameter in desorption.

(3) The zero point charge ( $\text{pH}_{\text{pzc}}$ ) of the composite was determined regarding the pH drift method. 0.1 g TDA@LDH/CS composite and 50 mL NaCl solution were mixed in 100 mL conical flask and adjusted the initial pH values ( $\text{pH}_{\text{Initial}}$ ) of NaCl solution from 2 to 12 with HCl and NaOH, the final pH values ( $\text{pH}_{\text{Final}}$ ) was measured after occasional shaking for 24 h. The  $\text{pH}_{\text{PZC}}$  of the composite was discovered at  $\Delta\text{pH} = 0$  ( $\Delta\text{pH} = \text{pH}_{\text{Final}} - \text{pH}_{\text{Initial}}$ ).

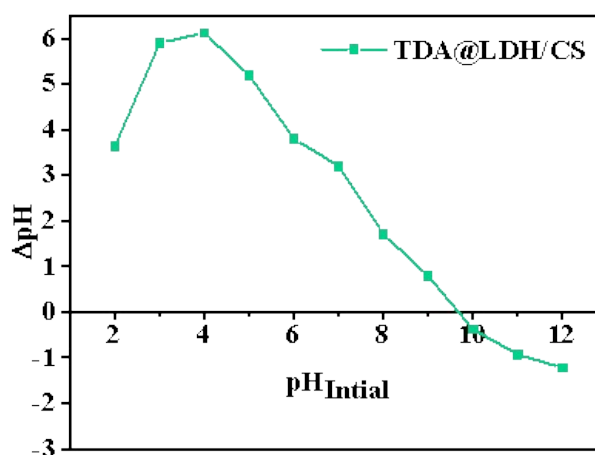

Fig. S3. Point of zero charge of TDA@LDH/CS

Table S2 The analysis of the dissolved ions in solution after adsorption of  $\text{NO}_3^-$  at  $\text{pH}=7 \pm 0.1$ .

| Test batch | Ions concentration (mg/L) |                  |
|------------|---------------------------|------------------|
|            | $\text{Mg}^{2+}$          | $\text{Al}^{3+}$ |
| 1          | 0.115                     | 0.022            |
| 2          | 0.168                     | 0.069            |
| 3          | 0.066                     | 0.042            |

(4) The relevant parameters of the intraparticle diffusion model are shown in Table S3.

**Table S3.** Comparison of the removal rate constants with other adsorbents

| Adsorbents                           | Rate Constant<br>(g/mg·min) | References |
|--------------------------------------|-----------------------------|------------|
| MgAl-modified biochar                | 0.005                       | [1]        |
| ZnAl-LDH                             | 0.04                        | [2]        |
| ZnFe-LDHs-activated carbon           | 0.008                       | [3]        |
| ZnAl-LDHs/activated carbon composite | 0.01                        | [4]        |
| MgFe-LDH/biochar                     | 0.10                        | [5]        |
| TDA@LDH/CS                           | 0.11                        | This study |

**Table S4.** Intraparticle diffusion data of TDA@LDH/CS for the removal of NO<sub>3</sub><sup>-</sup>

| $C_0$<br>(mg·L <sup>-1</sup> ) | First stage |       | Second stage |       |
|--------------------------------|-------------|-------|--------------|-------|
|                                | $k_1$       | $R^2$ | $k_2$        | $R^2$ |
| 2                              | 0.31        | 1.00  | 0.05         | 0.95  |
| 4                              | 0.78        | 0.94  | 0.07         | 1.00  |
| 6                              | 0.89        | 0.92  | 0.07         | 0.98  |
| 8                              | 1.10        | 0.93  | 0.05         | 0.99  |
| 10                             | 0.96        | 0.92  | 0.16         | 0.99  |

(5) The XRD calculation results of crystal lattice parameters were shown in **Table S5**

**Table S5.** XRD data of TDA@LDH/CS before and after adsorption.

| Sample            | $D_{(003)}$ (Å) | $D_{(110)}$ (Å) | a(Å) | c(Å)  | Interlayer distance (Å) |
|-------------------|-----------------|-----------------|------|-------|-------------------------|
| Before adsorption | 8.11            | 1.54            | 3.08 | 24.33 | <b>3.31</b>             |
| After adsorption  | 8.01            | 1.54            | 3.08 | 24.03 | <b>3.21</b>             |

\*  $a = 2d_{(110)}$ ;  $c = 3d_{(003)}$ ; Interlayer distance =  $d_{(003)} - 4.8\text{Å}$

#### References:

[1] Yin Q, Wang R, Zhao Z. Application of Mg–Al-modified biochar for simultaneous removal of

ammonium, nitrate, and phosphate from eutrophic water[J]. *Journal of Cleaner Production*, 2018, 176: 230-240.

[2] Islam M, Patel R. Synthesis and physicochemical characterization of Zn/Al chloride layered double hydroxide and evaluation of its nitrate removal efficiency[J]. *Desalination*, 2010, 256(1-3): 120-128.

[3] Karthikeyan P, Meenakshi S. Enhanced removal of phosphate and nitrate ions by a novel ZnFe LDHs-activated carbon composite[J]. *Sustainable Materials and Technologies*, 2020, 25: e00154.

[4] Karthikeyan P, Meenakshi S. Synthesis and characterization of Zn–Al LDHs/activated carbon composite and its adsorption properties for phosphate and nitrate ions in aqueous medium[J]. *Journal of Molecular Liquids*, 2019, 296: 111766.

[5] Xue L, Gao B, Wan Y, et al. High efficiency and selectivity of MgFe-LDH modified wheat-straw biochar in the removal of nitrate from aqueous solutions[J]. *Journal of the Taiwan Institute of Chemical Engineers*, 2016, 63: 312-317.
